# Supplementary material for: Pharmacokinetics and Pharmacodynamics of Intramuscular and Oral Betamethasone and Dexamethasone in Reproductive Age Women in India
Source: PubMed Central journal article supplement (PMC7070803; doi:10.1111/cts.12724), 2019-12-13
Supplement: CTS-13-391-s001.pdf [file CTS-13-391-s001.pdf]

**A**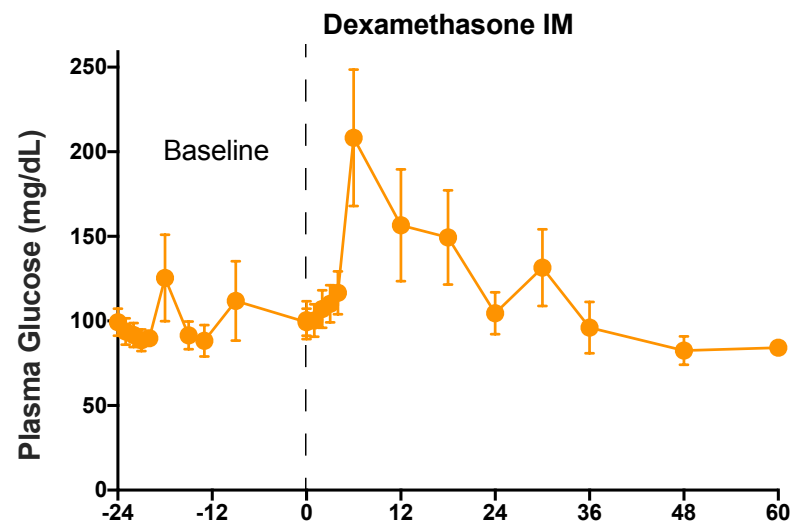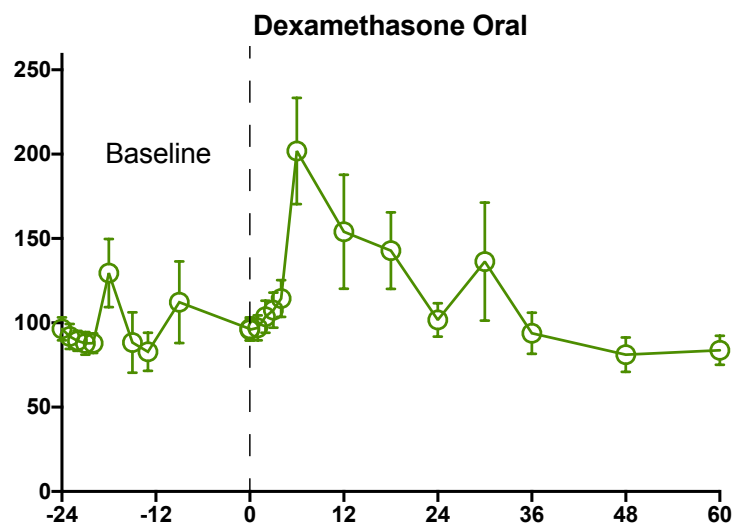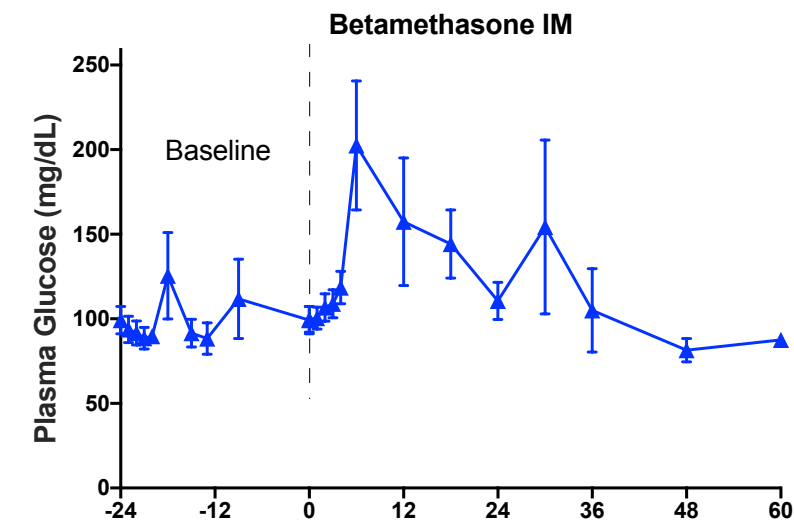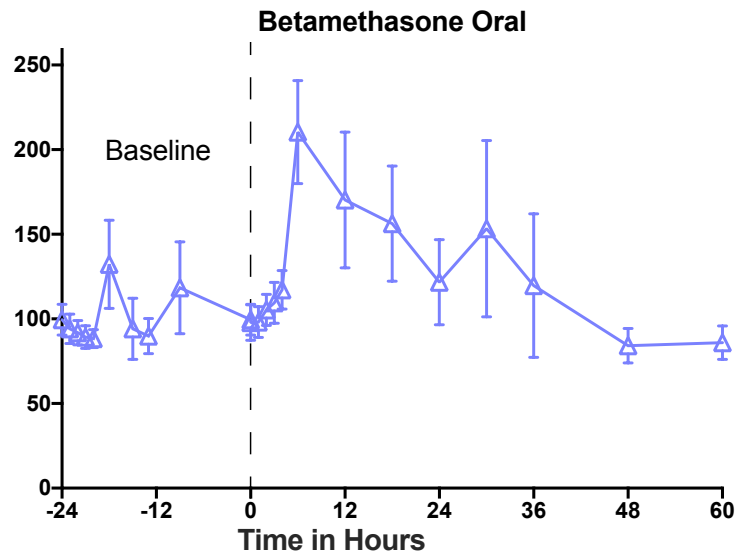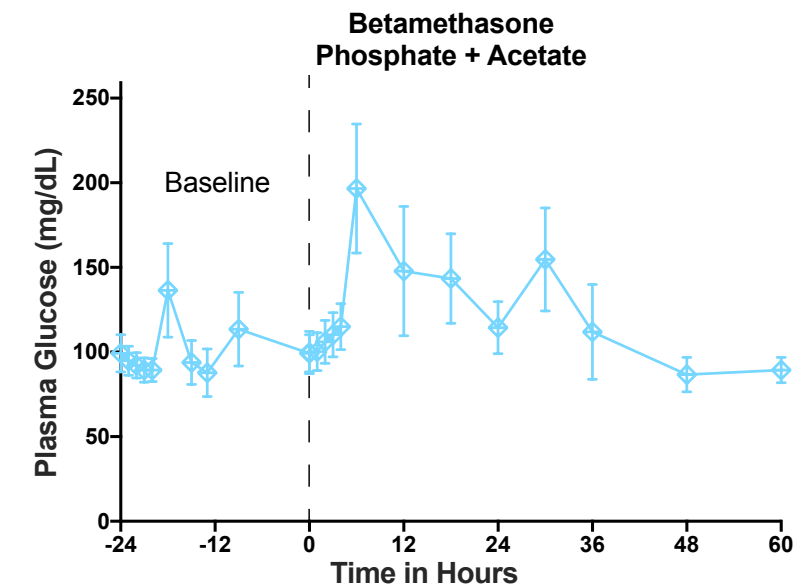

**B**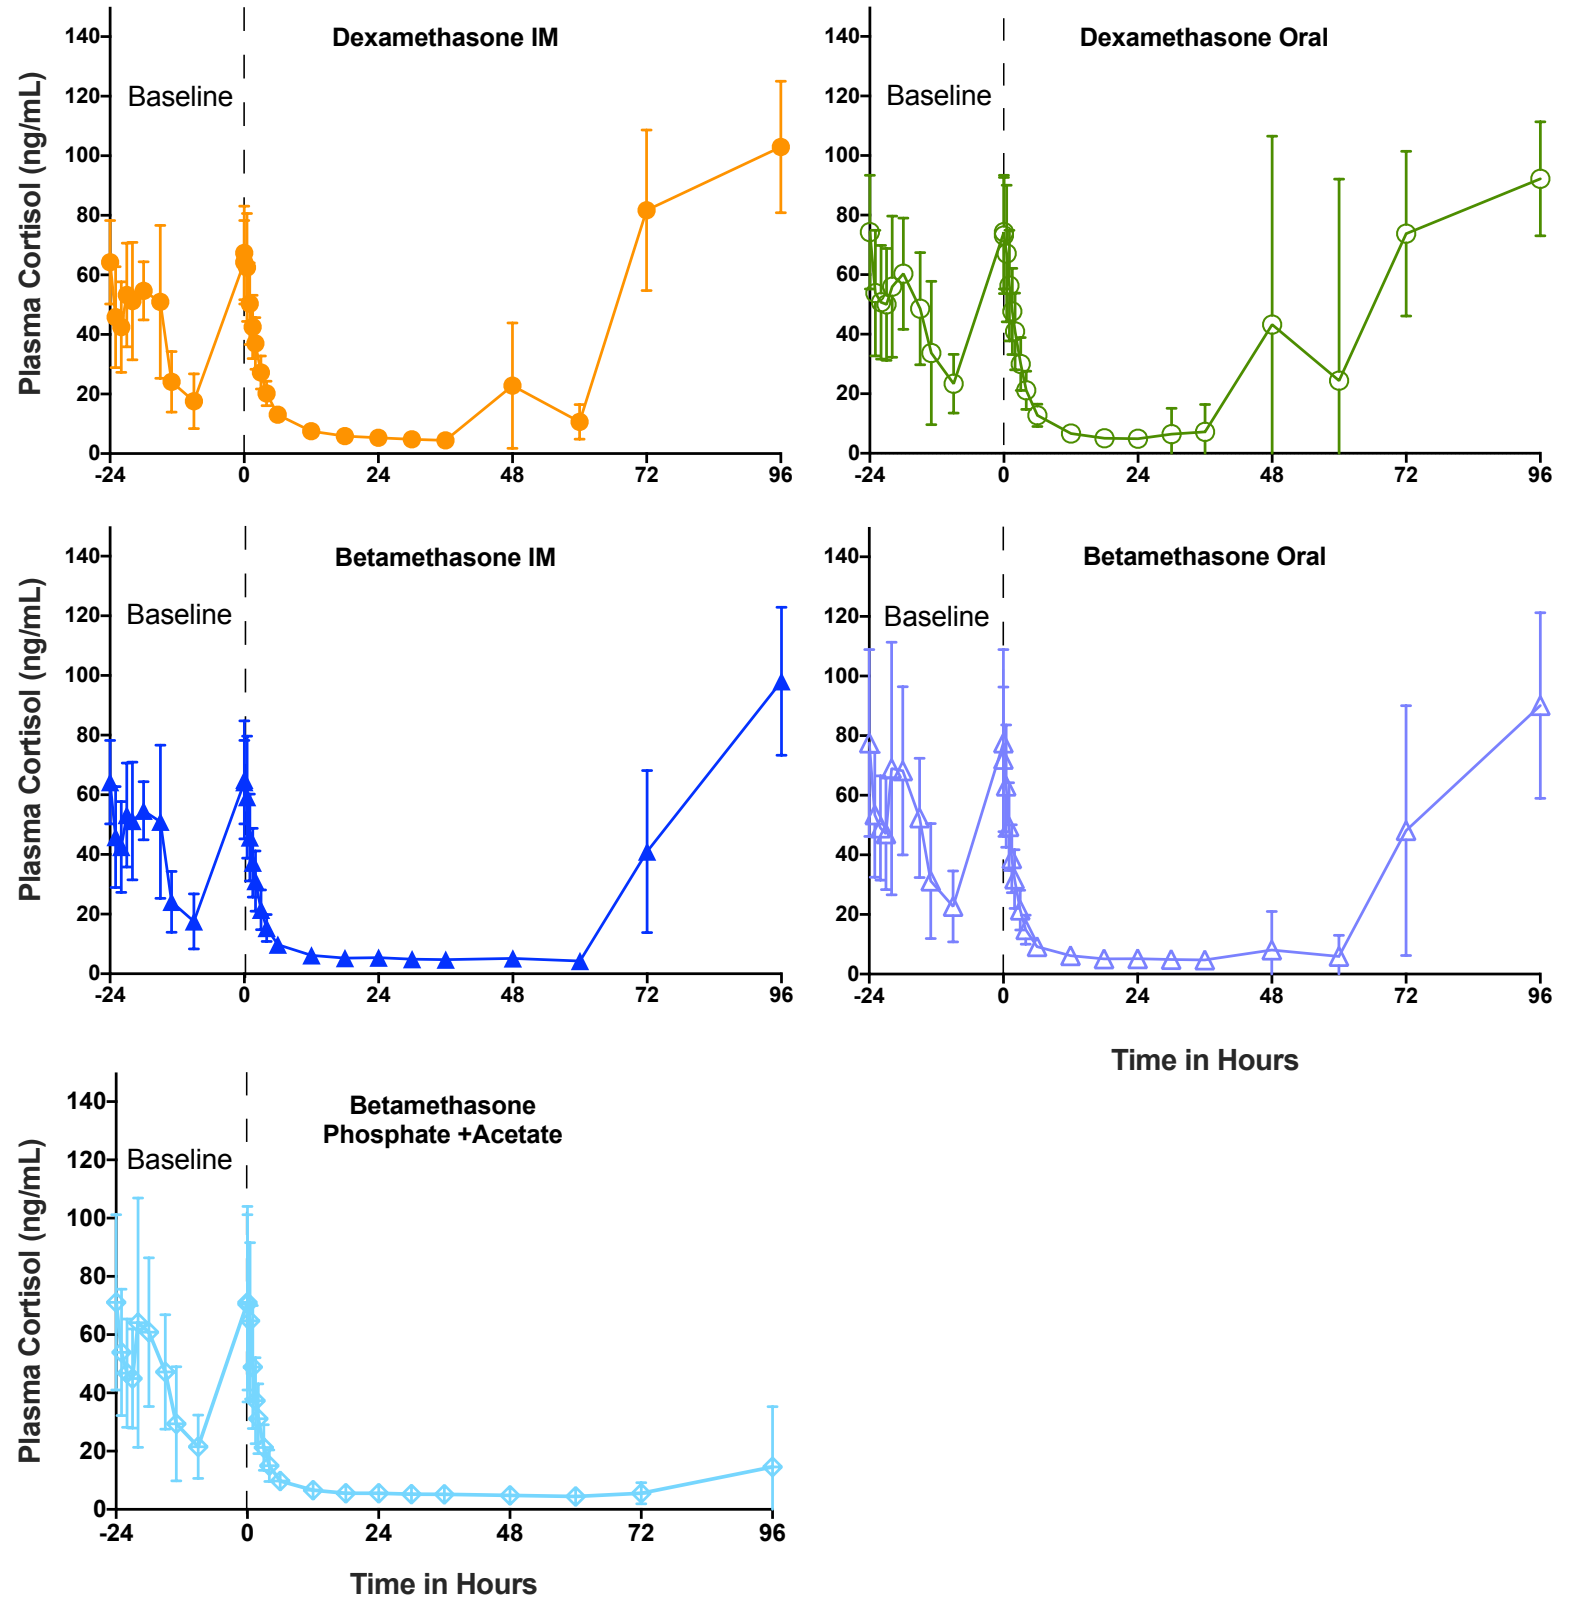

**Fig S1: Baseline and treatment response curves for (a) plasma glucose and (b) plasma cortisol. Group means  $\pm$  1 SD are given for each of the IM or Oral treatments that delivered 6 mg of dexamethasone or betamethasone.**
