# Supplementary material for: Pharmacokinetics and Pharmacodynamics of Intramuscular and Oral Betamethasone and Dexamethasone in Reproductive Age Women in India
Source: PubMed Central journal article supplement (PMC7070803; doi:10.1111/cts.12724), 2019-12-13
Supplement: CTS-13-391-s002.pdf [file CTS-13-391-s002.pdf]

**A**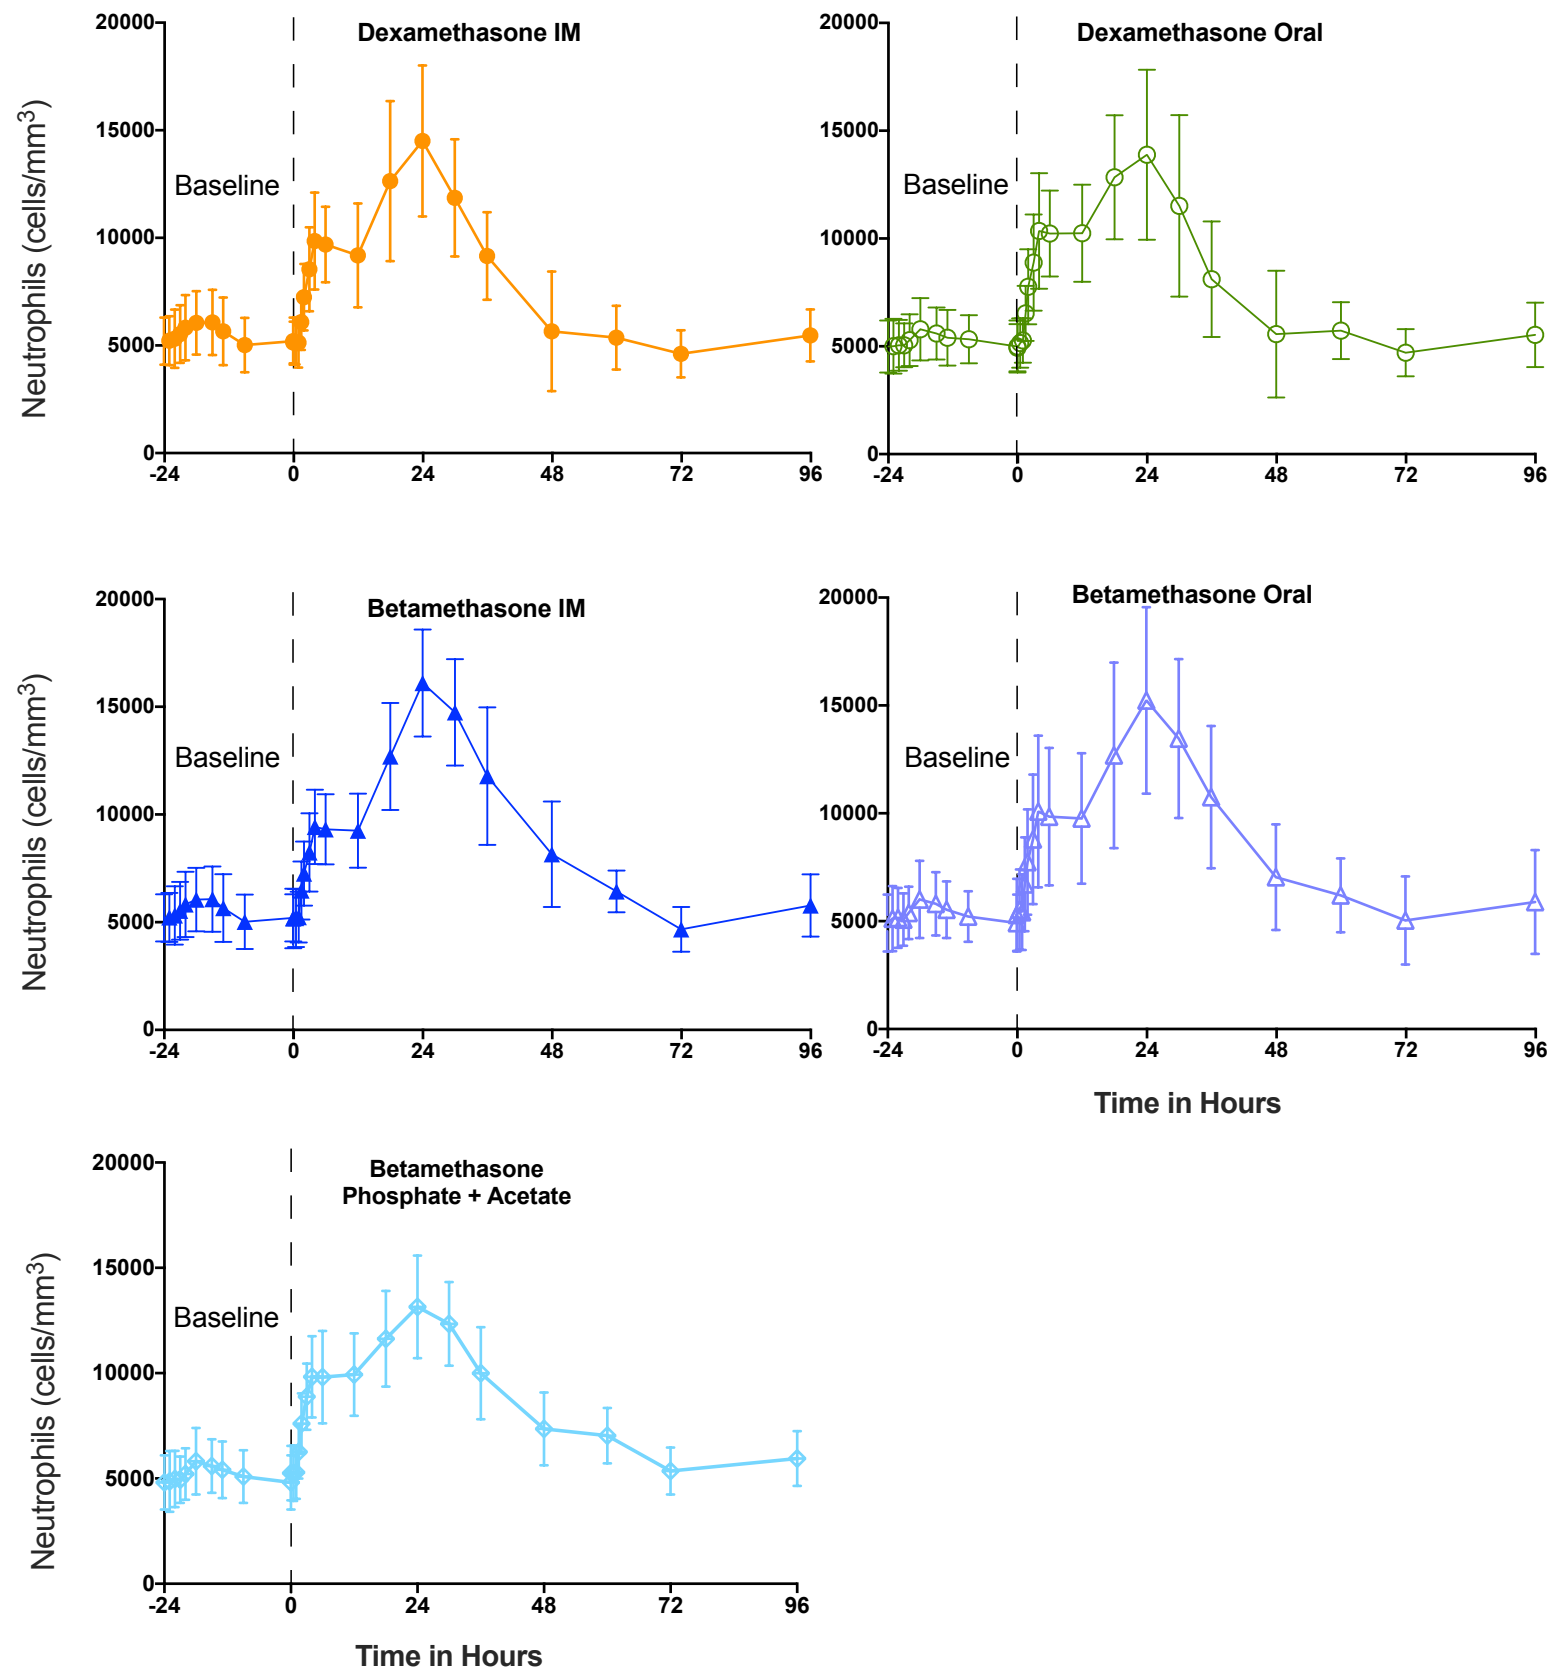

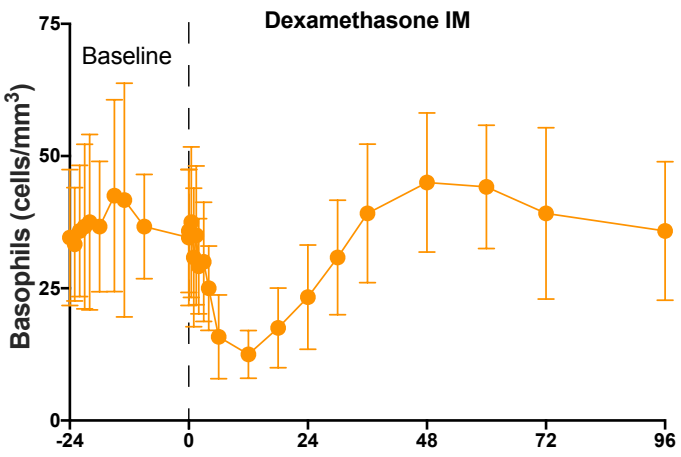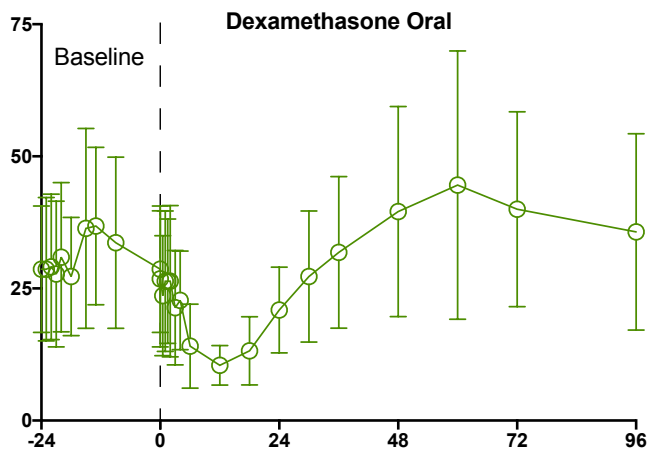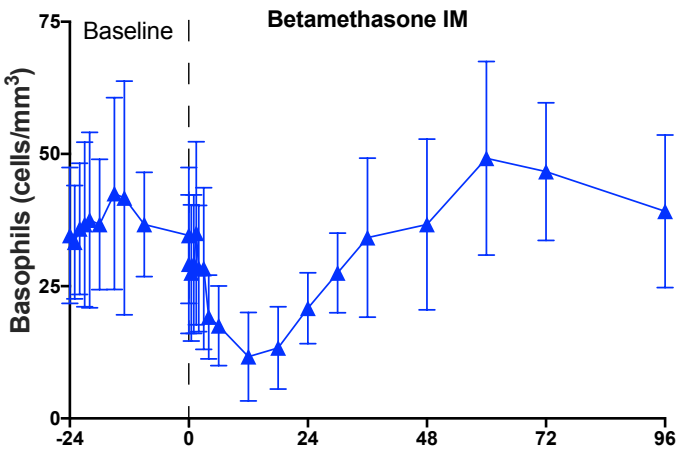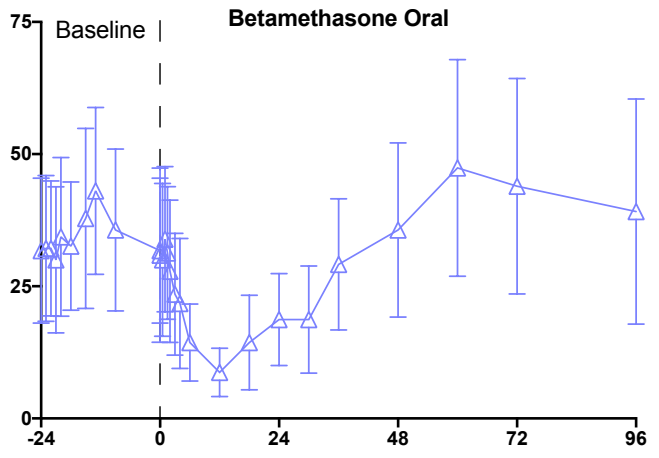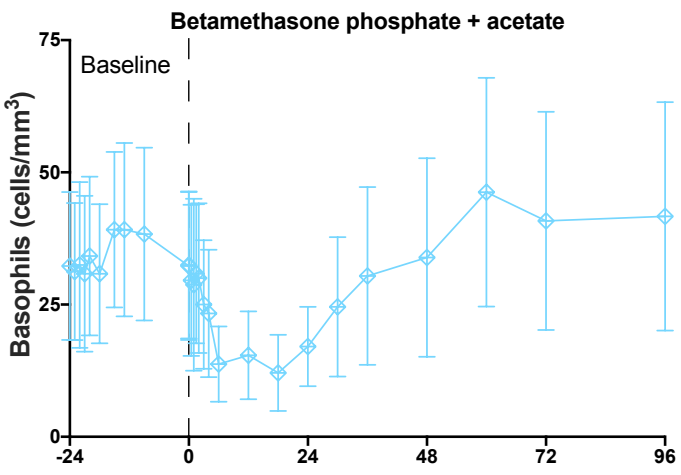

Time in Hours

**C**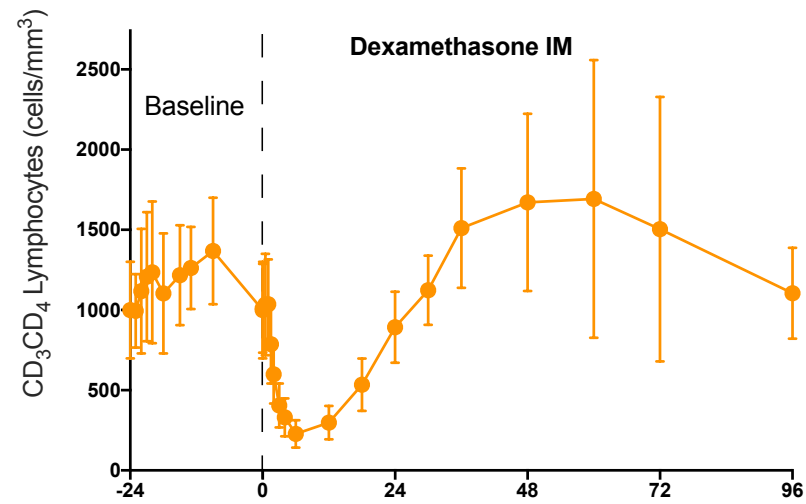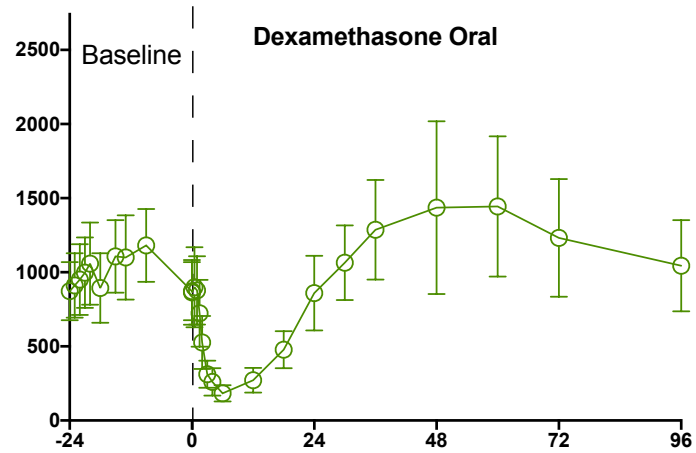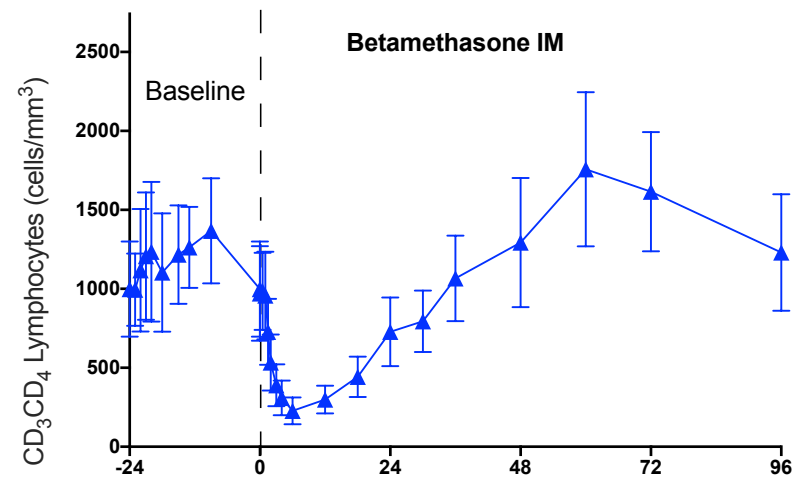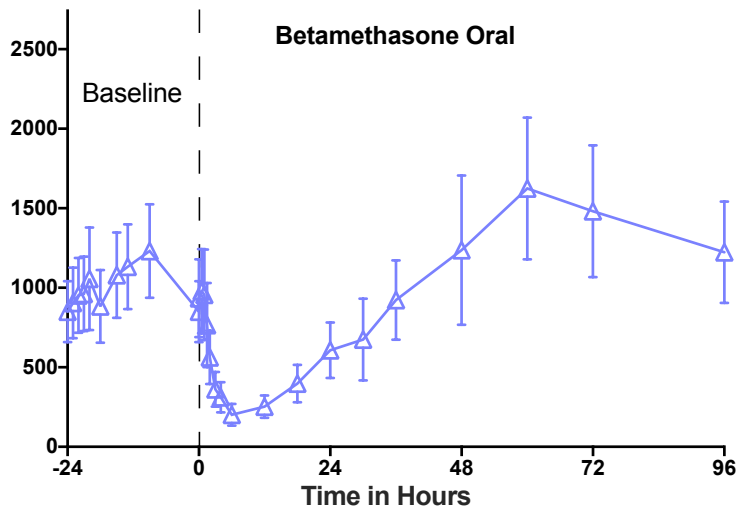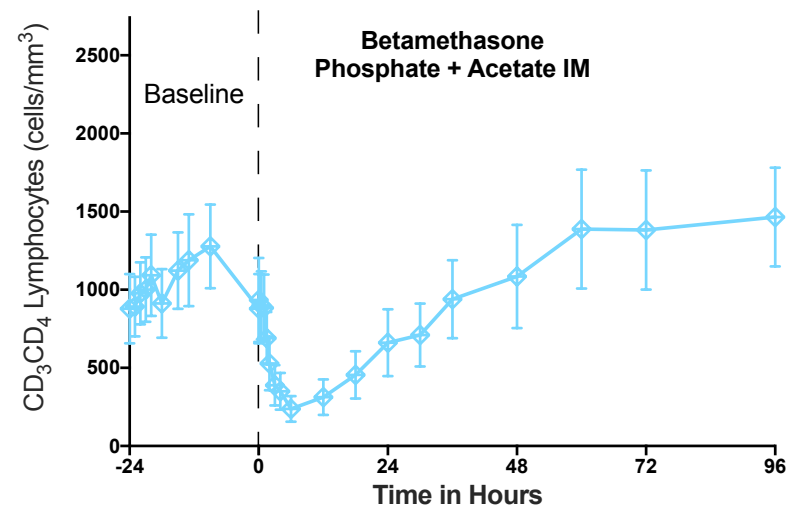

**D**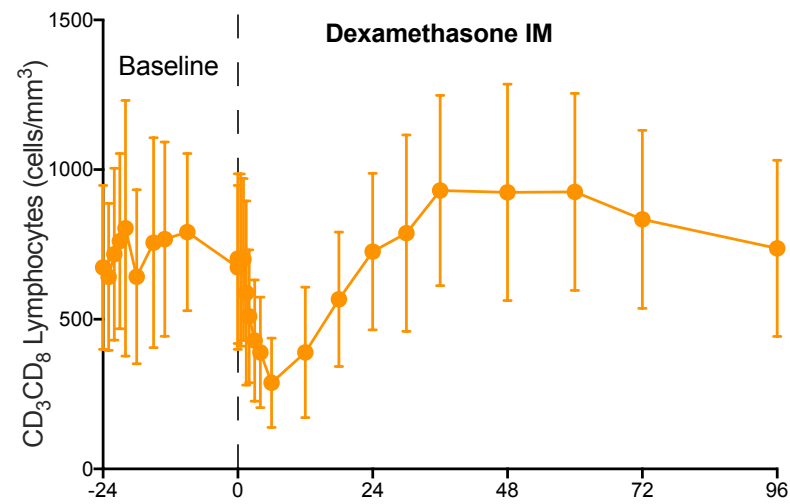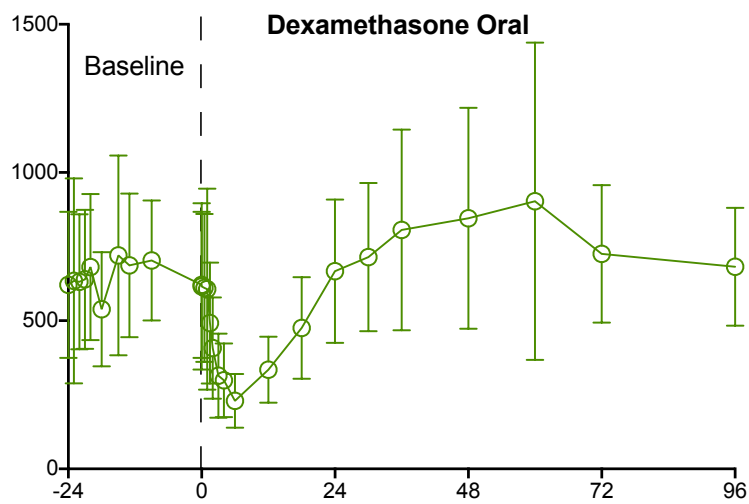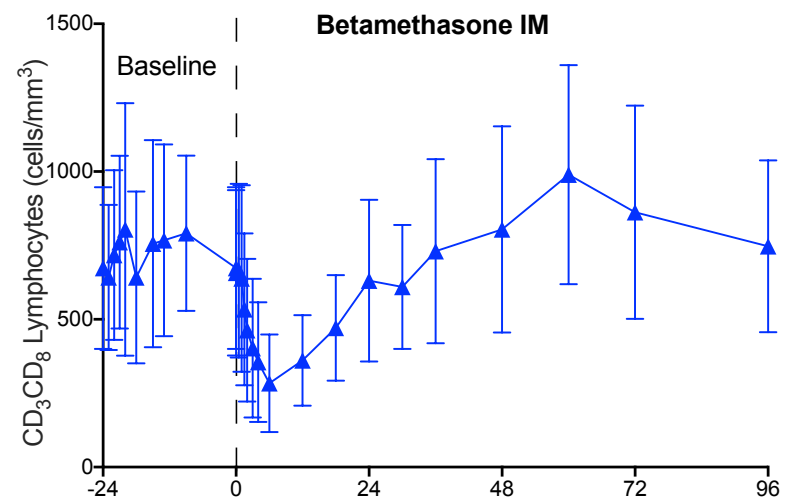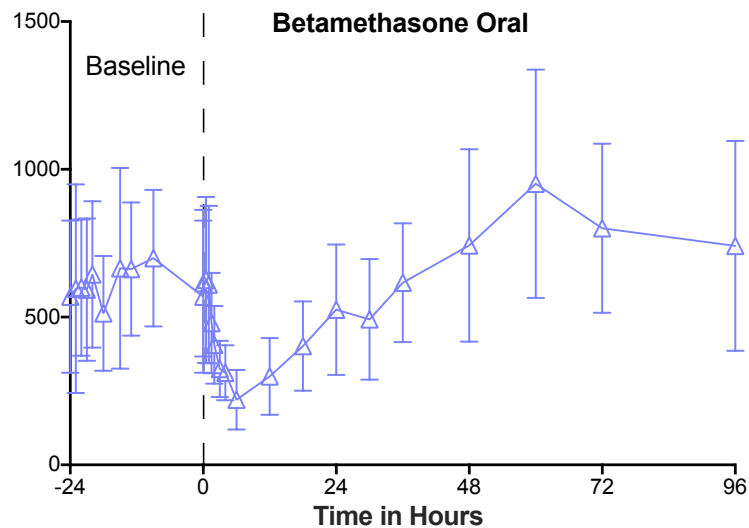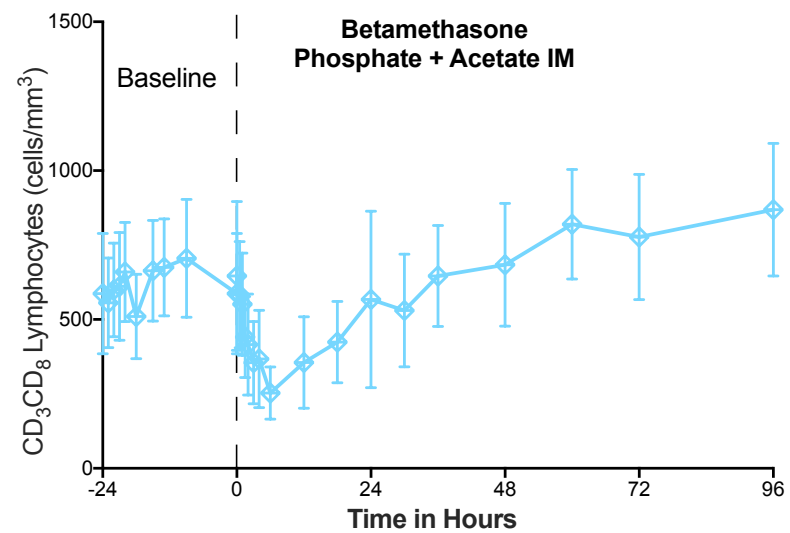

**Fig S2: Baseline and treatment response curves for (a) blood neutrophils, (b) basophils, (c) CD<sub>3</sub>CD<sub>4</sub> lymphocytes, and (d) CD<sub>3</sub>CD<sub>8</sub> lymphocytes. Group means  $\pm$  1 SD are given for each of the IM or Oral treatments that delivered 6 mg of dexamethasone or betamethasone.**
