# Supplementary material for: Pharmacokinetics and Pharmacodynamics of Intramuscular and Oral Betamethasone and Dexamethasone in Reproductive Age Women in India
Source: PubMed Central journal article supplement (PMC7070803; doi:10.1111/cts.12724), 2019-12-13
Supplement: CTS-13-391-s003.pdf [file CTS-13-391-s003.pdf]

Table S1: Source of Corticosteroids used for study

| Corticosteroid                                        | Route of Treatment | Format          | Source                          | % of label claim |
|-------------------------------------------------------|--------------------|-----------------|---------------------------------|------------------|
| Dexamethasone NaPO <sub>4</sub>                       | IM                 | 4mg/ml-8ml Amp. | Dexalab-Laborate Pharma India   | 103%             |
| Betamethasone NaPO <sub>4</sub>                       | IM                 | 4mg/ml          | Betnsol®-GalaxoSmithKlein-India | 97%              |
| Betamethasone NaPO <sub>4</sub> +<br>Betamethasone Ac | IM                 | 6mg/ml          | Celestone® Soluspan-MERCK, USA  | 101%             |
| Dexamethasone NaPO <sub>4</sub>                       | PO                 | 0.5mg tabs      | Dexona®- Zydas Alidac, India    | 108%             |
| Betamethasone NaPO <sub>4</sub>                       | PO                 | 0.5mg tabs      | Betnsol®-GalaxoSmithKlein-India | 102%             |
