# Supplementary material for: Pharmacokinetics and Pharmacodynamics of Intramuscular and Oral Betamethasone and Dexamethasone in Reproductive Age Women in India
Source: PubMed Central journal article supplement (PMC7070803; doi:10.1111/cts.12724), 2019-12-13
Supplement: CTS-13-391-s004.pdf [file CTS-13-391-s004.pdf]

Table S2: Demographics of study population (Mean  $\pm$  SD)

| Treatment                | IM Dexamethasone phosphate | IM Betamethasone phosphate | IM Betamethasone phosphate plus betamethasone acetate | Oral Dexamethasone phosphate | Oral Betamethasone phosphate |
|--------------------------|----------------------------|----------------------------|-------------------------------------------------------|------------------------------|------------------------------|
| Asian, Female (N)*       | 12                         | 12                         | 24                                                    | 22                           | 23                           |
| Age (years)              | 32.2 $\pm$ 4.9             | 32.2 $\pm$ 4.9             | 31.6 $\pm$ 4.0                                        | 31.6 $\pm$ 3.2               | 31.4 $\pm$ 3.9               |
| Height (cm)              | 152.3 $\pm$ 5.1            | 152.3 $\pm$ 5.1            | 152.8 $\pm$ 5.23                                      | 153.5 $\pm$ 4.3              | 153.3 $\pm$ 5.6              |
| Weight (kg)              | 56.7 $\pm$ 4.2             | 56.7 $\pm$ 4.2             | 55.9 $\pm$ 4.4                                        | 56.3 $\pm$ 4.0               | 57.7 $\pm$ 4.5               |
| BMI (kg/m <sup>2</sup> ) | 24.4 $\pm$ 0.9             | 24.4 $\pm$ 0.9             | 23.9 $\pm$ 1.2                                        | 23.9 $\pm$ 1.3               | 24.5 $\pm$ 0.6               |

\*Demographics are for women randomized to the 5 treatment groups, but excluding those without PK or PD profiles. Each woman is included in 2 groups.
