# Supplementary material for: Pharmacokinetics and Pharmacodynamics of Intramuscular and Oral Betamethasone and Dexamethasone in Reproductive Age Women in India
Source: PubMed Central journal article supplement (PMC7070803; doi:10.1111/cts.12724), 2019-12-13
Supplement: CTS-13-391-s005.pdf [file CTS-13-391-s005.pdf]

Table S3: Mean  $\pm$ 1 SD Baseline Cortisol Values and Percent Change from Period 1 to Period 2 Baseline Values by Treatment in Period 1

| Treatment in Period 1              | IM Dexamethasone phosphate | IM Betamethasone phosphate | IM Betamethasone phosphate plus betamethasone acetate | Oral Dexamethasone phosphate | Oral Betamethasone phosphate |
|------------------------------------|----------------------------|----------------------------|-------------------------------------------------------|------------------------------|------------------------------|
| <b>Cortisol</b>                    |                            |                            |                                                       |                              |                              |
| Period 1 Hr 0 ( $\mu\text{g/mL}$ ) | 69.1 $\pm$ 13.8            | 68.1 $\pm$ 16.8            | 84.3 $\pm$ 40.1                                       | 73.7 $\pm$ 18.7              | 81.2 $\pm$ 28.7              |
| Period 2 Hr 0 ( $\mu\text{g/mL}$ ) | 62.0 $\pm$ 23.7            | 65.7 $\pm$ 18.7            | 62.7 $\pm$ 13.9                                       | 62.4 $\pm$ 16.7              | 61.5 $\pm$ 23.7              |
| %-Change from Period 1 to Period 2 | -11.8 $\pm$ 24.2           | 0.2 $\pm$ 33.1             | -14.3 $\pm$ 33.5                                      | -13.9 $\pm$ 18.3             | -23.5 $\pm$ 19.7             |
| P-value                            | 0.637                      |                            |                                                       |                              |                              |

Note: P-value is testing for differences among the five treatments from the analysis of covariance model with terms for the Period 1, Hr 0 value and treatment.
