# Supplementary material for: Pharmacokinetics and Pharmacodynamics of Intramuscular and Oral Betamethasone and Dexamethasone in Reproductive Age Women in India
Source: PubMed Central journal article supplement (PMC7070803; doi:10.1111/cts.12724), 2019-12-13
Supplement: CTS-13-391-s007.pdf [file CTS-13-391-s007.pdf]

Table S5: Mean  $\pm$ 1 SD Baseline Neutrophil Counts and Percent Change from Period 1 to Period 2.

| Treatment in Period 1              | IM Dexamethasone phosphate | IM Betamethasone phosphate | IM Betamethasone phosphate plus betamethasone acetate | Oral Dexamethasone phosphate | Oral Betamethasone phosphate |
|------------------------------------|----------------------------|----------------------------|-------------------------------------------------------|------------------------------|------------------------------|
| <b>Neutrophils</b>                 |                            |                            |                                                       |                              |                              |
| Period 1 Hr 0 (/mm <sup>3</sup> )  | 5617 $\pm$ 901             | 4882 $\pm$ 1463            | 4762 $\pm$ 1121                                       | 4715 $\pm$ 1008              | 5152 $\pm$ 1411              |
| Period 2 Hr 0 (/mm <sup>3</sup> )  | 5467 $\pm$ 1363            | 4657 $\pm$ 843             | 5192 $\pm$ 1234                                       | 5926 $\pm$ 1865              | 5043 $\pm$ 1337              |
| %-Change from Period 1 to Period 2 | -3.0 $\pm$ 17.9            | -0.1 $\pm$ 26.4            | 13.1 $\pm$ 32.6                                       | 26.3 $\pm$ 31.9              | 1.0 $\pm$ 22.8               |
| P-value                            | 0.265                      |                            |                                                       |                              |                              |

Note: P-value is testing for differences among the five treatments from the analysis of covariance model with terms for the Period 1, Hr 0 value and treatment.
