# Supplementary material for: Pharmacokinetics and Pharmacodynamics of Intramuscular and Oral Betamethasone and Dexamethasone in Reproductive Age Women in India
Source: PubMed Central journal article supplement (PMC7070803; doi:10.1111/cts.12724), 2019-12-13
Supplement: CTS-13-391-s009.pdf [file CTS-13-391-s009.pdf]

**Supplement to:**

**Pharmacokinetics and Pharmacodynamics of intramuscular and oral betamethasone and  
dexamethasone in reproductive age women in India**

**Alan H. Jobe**

Division of Pulmonary Biology  
Cincinnati Children's Hospital Medical Center  
University of Cincinnati, Cincinnati, OH

**Mark A. Milad**

Milad Pharmaceutical Consulting LLC,  
Plymouth, Michigan, USA

**Thomas Peppard**

Certara, Inc,  
Princeton, NJ, USA

**William J. Jusko**

State University of New York  
School of Pharmacy and Pharmaceutical Sciences  
University of Buffalo  
Buffalo, NY, USA

Corresponding Author:

Alan H. Jobe, MD, PhD  
Cincinnati Children's Hospital  
3333 Burnet Avenue  
Cincinnati, OH 45229  
513-636-8563  
[Alan.Job@cchmc.org](mailto:Alan.Job@cchmc.org)
